# Supplementary material
Source: PubMed Central journal article supplement (PMC4415007)
Supplement: supp_fj.14-261537_Supplemental_Table1.pdf [file supp_fj.14-261537_Supplemental_Table1.pdf]

**Supplemental Table 1. Changes in expression of fibrosis-related genes (8 months of age).**

| <b>Gene</b> | <b>WT (FPKM)</b> | <b>E1/2KO (FPKM)</b> | <b>*<i>P</i></b> |
|-------------|------------------|----------------------|------------------|
| Col1a1      | 0.57426          | 3.25281              | 0.00105          |
| Col1a2      | 1.48316          | 4.99365              | 0.00105          |
| Col4a2      | 1.23081          | 4.23792              | 0.00105          |
| Ctgf        | 1.46205          | 8.21450              | 0.00105          |
| Tgfbi       | 10.73690         | 23.26480             | 0.00105          |
| Anxa2       | 13.81650         | 36.84160             | 0.00105          |
| Cidea       | 7.39461          | 17.64190             | 0.00105          |

\* FDR-adjusted *P*-value by Cuffdiff
