# Supplementary material
Source: PubMed Central journal article supplement (PMC4415007)
Supplement: supp_fj.14-261537_Supplemental_Table2.pdf [file supp_fj.14-261537_Supplemental_Table2.pdf]

**Supplemental Table 2. Changes in expression of the Hox and Pax genes.**

| <b>Gene</b> | <b>WT (FPKM)</b> | <b>E1/2KO (FPKM)</b> | <b>*<i>P</i></b> |
|-------------|------------------|----------------------|------------------|
| Hoxa11      | 0.00000          | 0.66056              | 0.00105          |
| Hoxa11as    | 0.00000          | 0.72673              | 0.00105          |
| Hoxc10      | 0.00000          | 0.71486              | 0.00105          |
| Hoxc9       | 0.00000          | 0.58381              | 0.00105          |
| Pax6        | 0.04429          | 0.38830              | 0.02126          |

\* FDR-adjusted *P*-value by Cuffdiff
