# Supplementary material
Source: PubMed Central journal article supplement (PMC4415007)
Supplement: supp_fj.14-261537_Supplemental_Table3.pdf [file supp_fj.14-261537_Supplemental_Table3.pdf]

Supplemental Table 3. List of genes highly susceptible to epigenetic dysregulation (3 months of age).

| Category       | H3K27me3<br>(log2 fold) | Gene expression<br>(log2 fold change) |       | Category       | H3K27me3<br>(log2 fold) | Gene expression<br>(log2 fold change) |       |
|----------------|-------------------------|---------------------------------------|-------|----------------|-------------------------|---------------------------------------|-------|
| Gene           | E12KO<br>/WT            | E12KO<br>/WT                          | *P    | Gene           | E12KO<br>/WT            | E12KO<br>/WT                          | *P    |
| <b>Cyp2a4</b>  | -2.115                  | 7.976                                 | 0.001 | <b>Ptp4a3</b>  | -0.828                  | 1.524                                 | 0.001 |
| <b>Cyp2b13</b> | -2.112                  | 4.745                                 | 0.001 | <b>Selm</b>    | -0.824                  | 1.899                                 | 0.001 |
| <b>Scd2</b>    | -2.107                  | 3.080                                 | 0.001 | <b>Nck2</b>    | -0.759                  | 1.361                                 | 0.001 |
| <b>Cotl1</b>   | -2.094                  | 0.885                                 | 0.001 | <b>Tmem86a</b> | -0.749                  | 1.476                                 | 0.001 |
| <b>Cyp2b9</b>  | -1.838                  | 7.157                                 | 0.001 | <b>Meis1</b>   | -0.714                  | 1.240                                 | 0.001 |
| <b>Cyp2c69</b> | -1.823                  | 3.539                                 | 0.001 | <b>Rgs2</b>    | -0.709                  | 1.803                                 | 0.001 |
| <b>Cyp3a44</b> | -1.813                  | 4.045                                 | 0.001 | <b>Rnf145</b>  | -0.691                  | 0.855                                 | 0.001 |
| <b>Hao2</b>    | -1.757                  | 7.254                                 | 0.001 | <b>Src</b>     | -0.681                  | 1.613                                 | 0.001 |
| <b>Oxct1</b>   | -1.569                  | 1.670                                 | 0.001 | <b>Tead1</b>   | -0.627                  | 1.432                                 | 0.001 |
| <b>Prex1</b>   | -1.525                  | 1.412                                 | 0.001 | <b>Tspan17</b> | -0.600                  | 1.333                                 | 0.003 |
| <b>Cyp2c40</b> | -1.512                  | 3.919                                 | 0.001 | <b>Smoc2</b>   | -1.048                  | 1.042                                 | 0.003 |
| <b>Add3</b>    | -1.500                  | 0.878                                 | 0.001 | <b>Tnfaip8</b> | -0.867                  | 1.007                                 | 0.005 |
| <b>Me2</b>     | -1.403                  | 1.411                                 | 0.001 | <b>Ssbp4</b>   | -1.626                  | 1.037                                 | 0.006 |
| <b>Sult2a2</b> | -1.392                  | 4.937                                 | 0.001 | <b>Slc1a5</b>  | -1.761                  | 1.034                                 | 0.007 |
| <b>Wtip</b>    | -1.348                  | 1.416                                 | 0.001 | <b>Tsc22d4</b> | -0.591                  | 0.766                                 | 0.010 |
| <b>Adrb2</b>   | -1.311                  | 2.269                                 | 0.001 | <b>Dleu2</b>   | -0.855                  | 0.865                                 | 0.015 |
| <b>Slc25a4</b> | -1.286                  | 3.301                                 | 0.001 | <b>Apol10a</b> | -0.719                  | 3.343                                 | 0.022 |
| <b>Gbp7</b>    | -1.256                  | 0.959                                 | 0.001 | <b>Hsd3b1</b>  | -1.936                  | 4.242                                 | 0.025 |
| <b>Ctgf</b>    | -1.144                  | 2.027                                 | 0.001 | <b>Ezr</b>     | -1.287                  | 0.670                                 | 0.027 |
| <b>Krt23</b>   | -1.083                  | 3.499                                 | 0.001 | <b>A1bg</b>    | -1.729                  | 6.160                                 | 0.055 |
| <b>Coll1a2</b> | -1.021                  | 1.534                                 | 0.001 | <b>Fam70a</b>  | -0.616                  | 3.725                                 | 0.059 |
| <b>Gbp3</b>    | -1.019                  | 1.611                                 | 0.001 | <b>Rhoc</b>    | -1.060                  | 0.582                                 | 0.062 |
| <b>Ppic</b>    | -0.930                  | 2.035                                 | 0.001 | <b>Anxa2</b>   | -1.365                  | 0.512                                 | 0.068 |
| <b>Setd7</b>   | -0.887                  | 1.017                                 | 0.001 | <b>Pld1</b>    | -1.108                  | 0.529                                 | 0.088 |
| <b>Golm1</b>   | -0.860                  | 1.476                                 | 0.001 | <b>Sult2a1</b> | -2.267                  | 6.611                                 | 0.521 |
| <b>Fads3</b>   | -0.834                  | 1.495                                 | 0.001 |                |                         |                                       |       |

\* FDR-adjusted *P*-value by Cuffdiff
